# Supplementary material for: Estuarine gradients dictate spatiotemporal variations of microbiome networks in the Chesapeake Bay
Source: Environ Microbiome. 2021 Nov 27;16:22. doi: 10.1186/s40793-021-00392-z (PMC8627074; doi:10.1186/s40793-021-00392-z)
Supplement: Supplementary file 3 — Additional file 3: Table S3. Top 10 nodes with highest abundance/degree/betweenness centrality in each season [file 40793_2021_392_MOESM3_ESM.xlsx]

## Sheet: Table S3
Table S3. Top 10 nodes with highest abundance/degree/betweenness centrality in each season
	Rank	Winter		Spring		Summer		Autumn
Abundance	1	5_Bacteria; Bacteroidetes; Bacteroidia; Chitinophagales; Saprospiraceae; Candidatus Aquirestis; uncultured bacterium	1.7887	17_Bacteria; Planctomycetes; Planctomycetacia; Isosphaerales; Isosphaeraceae; uncultured; uncultured bacterium	1.14608	4_Bacteria; Cyanobacteria; Oxyphotobacteria; Synechococcales; Cyanobiaceae; Cyanobium PCC-6307	1.32361	2_Bacteria; Cyanobacteria; Oxyphotobacteria; Synechococcales; Cyanobiaceae; Cyanobium PCC-6307; uncultured cyanobacterium	1.17428
	2	14_Bacteria; Proteobacteria; Alphaproteobacteria; Rhodobacterales; Rhodobacteraceae; Sulfitobacter	1.23117	9_Bacteria; Actinobacteria; Acidimicrobiia; Microtrichales; Ilumatobacteraceae; CL500-29 marine group	1.00636	1_Bacteria; Proteobacteria; Alphaproteobacteria; SAR11 clade; Clade I; Clade Ia	0.842693	15_Bacteria; Proteobacteria; Gammaproteobacteria; Enterobacteriales; Enterobacteriaceae	1.17187
	3	12_Bacteria; Proteobacteria; Betaproteobacteria; Burkholderiaceae	1.08377	3_Bacteria; Proteobacteria; Alphaproteobacteria; SAR11 clade; Clade III	0.941213	6_Bacteria; Actinobacteria; Acidimicrobiia; Actinomarinales; Actinomarinaceae; Candidatus Actinomarina	0.83852	1_Bacteria; Proteobacteria; Alphaproteobacteria; SAR11 clade; Clade I; Clade Ia	1.03367
	4	3_Bacteria; Proteobacteria; Alphaproteobacteria; SAR11 clade; Clade III	0.86597	1_Bacteria; Proteobacteria; Alphaproteobacteria; SAR11 clade; Clade I; Clade Ia	0.93339	10_Bacteria; Actinobacteria; Actinobacteria; Frankiales; Sporichthyaceae; hgcI clade	0.714642	6_Bacteria; Actinobacteria; Acidimicrobiia; Actinomarinales; Actinomarinaceae; Candidatus Actinomarina	0.962718
	5	25_Bacteria; Verrucomicrobia; Verrucomicrobiae; Verrucomicrobiales; Rubritaleaceae; Persicirhabdus; uncultured bacterium	0.574924	23_Bacteria; Verrucomicrobia; Verrucomicrobiae; Verrucomicrobiales; Rubritaleaceae; Luteolibacter; uncultured bacterium	0.78528	7_Bacteria; Proteobacteria; Alphaproteobacteria; SAR11 clade; Clade II	0.60846	4_Bacteria; Cyanobacteria; Oxyphotobacteria; Synechococcales; Cyanobiaceae; Cyanobium PCC-6307	0.775672
	6	27_Bacteria; Verrucomicrobia; Verrucomicrobiae; Verrucomicrobiales; Rubritaleaceae; Luteolibacter	0.558149	11_Bacteria; Actinobacteria; Actinobacteria; Micrococcales; Microbacteriaceae; Candidatus Aquiluna; uncultured bacterium	0.668578	13_Bacteria; Verrucomicrobia; Verrucomicrobiae; Chthoniobacterales; Chthoniobacteraceae; LD29; uncultured marine bacterium	0.606298	22_Archaea; Thaumarchaeota; Nitrososphaeria; Nitrosopumilales; Nitrosopumilaceae; Candidatus Nitrosopumilus	0.635763
	7	16_Bacteria; Actinobacteria; Actinobacteria; Micrococcales; Microbacteriaceae	0.550455	5_Bacteria; Bacteroidetes; Bacteroidia; Chitinophagales; Saprospiraceae; Candidatus Aquirestis; uncultured bacterium	0.593968	8_Bacteria; Planctomycetes; Planctomycetacia; Pirellulales; Pirellulaceae; uncultured; marine metagenome	0.551843	3_Bacteria; Proteobacteria; Alphaproteobacteria; SAR11 clade; Clade III	0.612104
	8	18_Bacteria; Proteobacteria; Alphaproteobacteria; Rhodobacterales; Rhodobacteraceae	0.530077	19_Bacteria; Actinobacteria; Actinobacteria; PeM15	0.511034	20_Bacteria; Cyanobacteria; Oxyphotobacteria; Synechococcales; Cyanobiaceae; Synechococcus CC9902	0.466031	7_Bacteria; Proteobacteria; Alphaproteobacteria; SAR11 clade; Clade II	0.547663
	9	19_Bacteria; Actinobacteria; Actinobacteria; PeM15	0.514329	8_Bacteria; Planctomycetes; Planctomycetacia; Pirellulales; Pirellulaceae; uncultured; marine metagenome	0.453364	3_Bacteria; Proteobacteria; Alphaproteobacteria; SAR11 clade; Clade III	0.418587	8_Bacteria; Planctomycetes; Planctomycetacia; Pirellulales; Pirellulaceae; uncultured; marine metagenome	0.503108
	10	31_Bacteria; Proteobacteria; Alphaproteobacteria; Rhodobacterales; Rhodobacteraceae; Pseudorhodobacter	0.483544	16_Bacteria; Actinobacteria; Actinobacteria; Micrococcales; Microbacteriaceae	0.420674	11_Bacteria; Actinobacteria; Actinobacteria; Micrococcales; Microbacteriaceae; Candidatus Aquiluna; uncultured bacterium	0.259946	10_Bacteria; Actinobacteria; Actinobacteria; Frankiales; Sporichthyaceae; hgcI clade	0.397916
Degree	1	228_Bacteria; Proteobacteria; Gammaproteobacteria; Enterobacteriales; Enterobacteriaceae; Pantoea	52	127_Bacteria; Proteobacteria; Gammaproteobacteria; OM182 clade	49	111_Bacteria; Bacteroidetes; Bacteroidia; Cytophagales; Cyclobacteriaceae; Algoriphagus; uncultured bacterium ARCTIC47	51	110_Bacteria; Bacteroidetes; Bacteroidia; Cytophagales; Cyclobacteriaceae; Algoriphagus; uncultured Hongiella sp.	44
	2	175_Bacteria; Planctomycetes; Planctomycetacia; Pirellulales; Pirellulaceae; Pirellula; uncultured planctomycete	47	79_Bacteria; Bacteroidetes; Bacteroidia; Flavobacteriales; Flavobacteriaceae; NS5 marine group; uncultured Bacteroidetes bacterium	47	10_Bacteria; Actinobacteria; Actinobacteria; Frankiales; Sporichthyaceae; hgcI clade	50	52_Bacteria; Proteobacteria; Betaproteobacteria; Burkholderiaceae; RS62 marine group; uncultured bacterium	43
	3	217_Bacteria; Kiritimatiellaeota; Kiritimatiellae; WCHB1-41; uncultured marine bacterium; uncultured marine bacterium; uncultured marine bacterium	46	29_Bacteria; Proteobacteria; Gammaproteobacteria; SAR86 clade	46	63_Bacteria; Actinobacteria; Actinobacteria; Frankiales; Sporichthyaceae; hgcI clade; actinobacterium SCGC AAA044-D11	49	204_Bacteria; Proteobacteria; Alphaproteobacteria; SAR11 clade; Clade III; uncultured bacterium; uncultured bacterium	43
	4	44_Bacteria; Planctomycetes; Phycisphaerae; Phycisphaerales; Phycisphaeraceae; CL500-3; uncultured bacterium	45	294_Bacteria; Proteobacteria; Alphaproteobacteria; Puniceispirillales; uncultured	46	191_Bacteria; Bacteroidetes; Bacteroidia; Flavobacteriales; Flavobacteriaceae; NS3a marine group; marine metagenome	49	12_Bacteria; Proteobacteria; Betaproteobacteria; Burkholderiaceae	42
	5	301_Bacteria; Actinobacteria; Actinobacteria; Pseudonocardiales; Pseudonocardiaceae; Pseudonocardia	45	78_Bacteria; Bacteroidetes; Bacteroidia; Sphingobacteriales; NS11-12 marine group; uncultured Flexibacteraceae bacterium; uncultured Flexibacteraceae bacterium	45	71_Bacteria; Proteobacteria; Alphaproteobacteria; Rhodobacterales; Rhodobacteraceae; Tateyamaria	48	116_Bacteria; Bacteroidetes; Bacteroidia; Flavobacteriales; Flavobacteriaceae; Polaribacter; uncultured bacterium	42
	6	247_Bacteria; Bacteroidetes; Bacteroidia; Chitinophagales; Saprospiraceae; Aureispira	45	40_Bacteria; Bacteroidetes; Bacteroidia; Chitinophagales; Saprospiraceae; uncultured; uncultured bacterium	45	82_Bacteria; Proteobacteria; Alphaproteobacteria; Puniceispirillales; SAR116 clade; Candidatus Puniceispirillum; uncultured bacterium	47	360_Bacteria; Proteobacteria; Gammaproteobacteria; Ga0077536; uncultured sulfur-oxidizing symbiont bacterium; uncultured sulfur-oxidizing symbiont bacterium; uncultured sulfur-oxidizing symbiont bacterium	42
	7	83_Bacteria; Proteobacteria; Alphaproteobacteria; Rhodobacterales; Rhodobacteraceae; Roseicyclus	44	155_Bacteria; Proteobacteria; Deltaproteobacteria; Desulfarculales; Desulfarculaceae; uncultured; uncultured delta proteobacterium	45	110_Bacteria; Bacteroidetes; Bacteroidia; Cytophagales; Cyclobacteriaceae; Algoriphagus; uncultured Hongiella sp.	47	108_Bacteria; Proteobacteria; Betaproteobacteria; Burkholderiaceae; Polynucleobacter	42
	8	56_Bacteria; Actinobacteria; Actinobacteria; PeM15; uncultured Actinomycetales bacterium; uncultured Actinomycetales bacterium; uncultured Actinomycetales bacterium	44	201_Bacteria; Bacteroidetes; Bacteroidia; Flavobacteriales; Flavobacteriaceae; NS5 marine group; uncultured Flavobacteriia bacterium	44	41_Bacteria; Actinobacteria; Actinobacteria; Frankiales; Sporichthyaceae	47	198_Bacteria; Bacteroidetes; Bacteroidia; Sphingobacteriales; NS11-12 marine group	42
	9	51_Bacteria; Actinobacteria; Acidimicrobiia; Microtrichales; Ilumatobacteraceae; uncultured; uncultured marine bacterium	44	176_Bacteria; Bacteroidetes; Bacteroidia; Cytophagales; Cyclobacteriaceae; Marinoscillum; uncultured Cytophagia bacterium	44	134_Bacteria; Actinobacteria; Actinobacteria; Frankiales; Sporichthyaceae; hgcI clade; Actinobacteria bacterium IMCC26103	47	26_Bacteria; Bacteroidetes; Bacteroidia; Flavobacteriales; Flavobacteriaceae; Flavobacterium	41
	10	418_Bacteria; Proteobacteria; Alphaproteobacteria; Rhizobiales; Methyloligellaceae; uncultured	44	190_Bacteria; Verrucomicrobia; Verrucomicrobiae; Opitutales; Opitutaceae; Cephaloticoccus; uncultured bacterium	44	132_Bacteria; Actinobacteria; Actinobacteria; Frankiales; Sporichthyaceae; Candidatus Planktophila; uncultured bacterium	47	134_Bacteria; Actinobacteria; Actinobacteria; Frankiales; Sporichthyaceae; hgcI clade; Actinobacteria bacterium IMCC26103	41
Betweenness	1	19_Bacteria; Actinobacteria; Actinobacteria; PeM15	1214.2	175_Bacteria; Planctomycetes; Planctomycetacia; Pirellulales; Pirellulaceae; Pirellula; uncultured planctomycete	1185.73	334_Bacteria; Proteobacteria; Gammaproteobacteria; Legionellales; Legionellaceae; Legionella; uncultured bacterium	1001.08	97_Bacteria; Bacteroidetes; Bacteroidia; Flavobacteriales; Cryomorphaceae; uncultured; uncultured Cryomorphaceae bacterium	937.059
	2	72_Bacteria; Proteobacteria; Alphaproteobacteria; Rhodobacterales; Rhodobacteraceae; Ascidiaceihabitans	1008.99	139_Bacteria; Proteobacteria; Deltaproteobacteria; Bdellovibrionales; Bdellovibrionaceae; Bdellovibrio; uncultured organism	1088.55	69_Bacteria; Bacteroidetes; Bacteroidia; Flavobacteriales; Crocinitomicaceae; Fluviicola	977.974	123_Bacteria; Planctomycetes; Planctomycetacia; Pirellulales; Pirellulaceae; Blastopirellula; uncultured Planctomycetales bacterium	802.75
	3	303_Bacteria; Proteobacteria; Alphaproteobacteria; Rhizobiales; Rhizobiaceae	980.583	199_Bacteria; Proteobacteria; Gammaproteobacteria; Cellvibrionales; Halieaceae	945.235	293_Bacteria; Proteobacteria; Gammaproteobacteria; EPR3968-O8a-Bc78; uncultured gamma proteobacterium; uncultured gamma proteobacterium; uncultured gamma proteobacterium	742.662	101_Bacteria; Proteobacteria; Betaproteobacteria; Burkholderiaceae; MWH-UniP1 aquatic group	758.888
	4	290_Bacteria; Proteobacteria; Deltaproteobacteria; Bradymonadales; uncultured bacterium; uncultured bacterium; uncultured bacterium	955.822	49_Bacteria; Actinobacteria; Acidimicrobiia; Microtrichales; Ilumatobacteraceae; CL500-29 marine group; uncultured bacterium	923.231	172_Bacteria; Proteobacteria; Gammaproteobacteria; Alteromonadales; Pseudoalteromonadaceae; Pseudoalteromonas	694.567	15_Bacteria; Proteobacteria; Gammaproteobacteria; Enterobacteriales; Enterobacteriaceae	716.41
	5	125_Bacteria; Proteobacteria; Alphaproteobacteria; Rhodospirillales; AEGEAN-169 marine group; marine metagenome; marine metagenome	893.839	376_Bacteria; Proteobacteria; Alphaproteobacteria; Thalassobaculales; Thalassobaculaceae; Thalassobaculum; alpha proteobacterium BAL199	906.963	138_Bacteria; Bacteroidetes; Bacteroidia; Chitinophagales; Saprospiraceae; Phaeodactylibacter; Phaeodactylibacter xiamenensis	674.944	393_Bacteria; Proteobacteria; Alphaproteobacteria; Rickettsiales; Mitochondria; uncultured actinobacterium; uncultured actinobacterium	690.852
	6	216_Bacteria; Proteobacteria; Gammaproteobacteria; Ectothiorhodospirales; Ectothiorhodospiraceae; uncultured; uncultured marine bacterium	871.317	97_Bacteria; Bacteroidetes; Bacteroidia; Flavobacteriales; Cryomorphaceae; uncultured; uncultured Cryomorphaceae bacterium	893.055	224_Bacteria; Bacteroidetes; Bacteroidia; Flavobacteriales; Flavobacteriaceae; uncultured; marine metagenome	641.495	105_Bacteria; Verrucomicrobia; Verrucomicrobiae; Verrucomicrobiales; Rubritaleaceae; Roseibacillus; uncultured Verrucomicrobiae bacterium	676.072
	7	336_Bacteria; Bacteroidetes; Bacteroidia; Sphingobacteriales; env.OPS 17	866.721	31_Bacteria; Proteobacteria; Alphaproteobacteria; Rhodobacterales; Rhodobacteraceae; Pseudorhodobacter	881.191	236_Bacteria; Bacteroidetes; Rhodothermia; Rhodothermales; Rhodothermaceae; uncultured; uncultured bacterium	638.851	23_Bacteria; Verrucomicrobia; Verrucomicrobiae; Verrucomicrobiales; Rubritaleaceae; Luteolibacter; uncultured bacterium	645.691
	8	209_Bacteria; Proteobacteria; Alphaproteobacteria; Caulobacterales; Hyphomonadaceae; Maricaulis; Maricaulis salignorans	853.247	368_Bacteria; Planctomycetes; Planctomycetacia; Gemmatales; Gemmataceae; uncultured	876.718	78_Bacteria; Bacteroidetes; Bacteroidia; Sphingobacteriales; NS11-12 marine group; uncultured Flexibacteraceae bacterium; uncultured Flexibacteraceae bacterium	632.039	43_Bacteria; Bacteroidetes; Bacteroidia; Flavobacteriales; Cryomorphaceae; uncultured; uncultured bacterium	641.303
	9	230_Bacteria; Bacteroidetes; Bacteroidia; Sphingobacteriales; LiUU-11-161	835.132	211_Bacteria; Bacteroidetes; Rhodothermia; Balneolales; Balneolaceae; uncultured; uncultured Sphingobacteriales bacterium	858.836	131_Bacteria; Proteobacteria; Alphaproteobacteria; Rhodobacterales; Rhodobacteraceae; Litorimicrobium; uncultured alpha proteobacterium	618.295	323_Bacteria; Bacteroidetes; Bacteroidia; Flavobacteriales; Crocinitomicaceae; Crocinitomix; unidentified marine bacterioplankton	625.828
	10	397_Bacteria; Proteobacteria; Alphaproteobacteria; Acetobacterales; Acetobacteraceae; Rhodovastum	816.273	67_Bacteria; Actinobacteria; Acidimicrobiia; Microtrichales; uncultured	849.944	122_Bacteria; Bacteroidetes; Bacteroidia; Flavobacteriales; Cryomorphaceae; uncultured; uncultured organism	597.107	34_Bacteria; Planctomycetes; Phycisphaerae; Phycisphaerales; Phycisphaeraceae; CL500-3; uncultured marine bacterium	618.355
