# Supplementary material for: Estuarine gradients dictate spatiotemporal variations of microbiome networks in the Chesapeake Bay
Source: Environ Microbiome. 2021 Nov 27;16:22. doi: 10.1186/s40793-021-00392-z (PMC8627074; doi:10.1186/s40793-021-00392-z)
Supplement: Supplementary file 6 — Additional file 6: Table S6. Correspondence of microbial groups and environmental factors for structural equation model [file 40793_2021_392_MOESM6_ESM.xlsx]

## Sheet: Table S6
Table S6. Correspondence of microbial groups and environmental factors for structural equation model
Predictor	Response	Std Estimate	P Value
Temp	DOP	0.55	0 ***
Temp	OP	0.2462	0.0268 *
Temp	Nitrate	-0.34	0.0001 ***
Temp	Alphaproteobacteria	-0.5416	0 ***
Temp	Betaproteobacteria	-0.4682	0 ***
Temp	Deltaproteobacteria	0.6449	0 ***
Temp	Bacteroidetes	-0.2295	0.0435 *
Temp	Cyanobacteria	0.4227	0 ***
Temp	Gemmatimonadetes	0.4214	0.0001 ***
Temp	Planctomycetes	0.3311	0.0027 **
Salinity	DOP	-0.1927	0.051
Salinity	OP	-0.3127	0.0054 **
Salinity	CHLA	-0.2798	0.0144 *
Salinity	Nitrate	-0.6191	0 ***
Salinity	NH4	-0.2176	0.0395 *
Salinity	Alphaproteobacteria	0.1869	0.0601
Salinity	Deltaproteobacteria	0.2624	0.0017 **
Salinity	Actinobacteria	-0.7782	0 ***
Salinity	Chlamydiae	0.3009	0.007 **
Salinity	Cyanobacteria	0.2589	0.0015 **
Salinity	Patescibacteria	0.2109	0.0647
Salinity	Verrucomicrobia	0.4282	0.0002 ***
TSS	TON	0.3552	0.0016 **
TSS	NH4	0.4117	0.0002 ***
TSS	Firmicutes	-0.2827	0.0201 *
TSS	PC	0.4447	0.0001 ***
TON	Chlamydiae	0.3918	0.0005 ***
TON	Cyanobacteria	-0.2044	0.0248 *
TON	Firmicutes	0.3085	0.0204 *
TON	Patescibacteria	0.3424	0.0032 **
Nitrate	Betaproteobacteria	0.3417	0.0005 ***
Nitrate	Actinobacteria	-0.2863	0.0198 *
Nitrate	Chloroflexi	-0.238	0.0496 *
NH4	Bacteroidetes	-0.1867	0.0988
NH4	Chloroflexi	0.3409	0.0055 **
NH4	Firmicutes	0.4191	0.0005 ***
NH4	Planctomycetes	0.2313	0.0336 *
DOP	Cyanobacteria	0.4646	0 ***
PC	Deltaproteobacteria	-0.1606	0.0487 *
CHLA	Firmicutes	0.1921	0.1348
CHLA	Verrucomicrobia	0.2612	0.02 *
~~TON	~~PC	0.8463	0 ***
~~Planctomycetes	~~Verrucomicrobia	0.4514	0 ***
~~OP	~~Nitrate	0.6099	0 ***
~~OP	~~TON	-0.2871	0.0063 **
~~OP	~~PC	-0.2919	0.0055 **
~~Nitrate	~~NH4	0.2463	0.0166 *
~~Gemmatimonadetes	~~Patescibacteria	0.2077	0.0368 *
~~Firmicutes	~~Patescibacteria	0.3828	0.0004 ***
~~Firmicutes	~~Gemmatimonadetes	0.4044	0.0002 ***
~~Firmicutes	~~Verrucomicrobia	-0.2391	0.0194 *
~~DOP	~~TON	0.4925	0 ***
~~DOP	~~PC	0.2766	0.0081 **
~~Deltaproteobacteria	~~Actinobacteria	-0.2778	0.0079 **
~~Deltaproteobacteria	~~Gemmatimonadetes	0.217	0.0307 *
~~Chloroflexi	~~Gemmatimonadetes	0.7362	0 ***
~~Chloroflexi	~~Firmicutes	0.3328	0.0018 **
~~Chloroflexi	~~Patescibacteria	0.3057	0.0038 **
~~Chlamydiae	~~Patescibacteria	0.4273	0.0001 ***
~~CHLA	~~TON	0.5599	0 ***
~~CHLA	~~PC	0.7143	0 ***
~~Betaproteobacteria	~~Planctomycetes	-0.2606	0.012 *
~~Betaproteobacteria	~~Chloroflexi	0.2565	0.0132 *
~~Betaproteobacteria	~~Firmicutes	0.2376	0.0201 *
~~Bacteroidetes	~~Firmicutes	-0.2862	0.0064 **
~~Bacteroidetes	~~Planctomycetes	-0.3931	0.0002 ***
~~Bacteroidetes	~~Verrucomicrobia	-0.2899	0.0058 **
~~Alphaproteobacteria	~~Betaproteobacteria	0.5763	0 ***
~~Alphaproteobacteria	~~Planctomycetes	-0.4757	0 ***
~~Alphaproteobacteria	~~Cyanobacteria	-0.2432	0.0178 *
~~Alphaproteobacteria	~~Firmicutes	0.2644	0.011 *
~~Alphaproteobacteria	~~Verrucomicrobia	-0.2796	0.0076 **
~~Actinobacteria	~~Patescibacteria	0.2912	0.0056 **
~~Actinobacteria	~~Firmicutes	0.2869	0.0063 **
~~Actinobacteria	~~Cyanobacteria	-0.2336	0.0219 *
~~ represent co-varied relations.
* P < 0.05
** P < 0.01
*** P < 0.001
